# Supplementary material for: Strong d–p orbital hybridization in cobalt porphyrin cages promotes electrochemical nitrate reduction to ammonia
Source: Royal Society of Chemistry journal article supplement (doi:10.1039/d5sc07183f), 2026-01-01
Supplement: d5sc07183f1.pdf [file d5sc07183f1.pdf]

## **Strong d-p Orbital Hybridization in Cobalt Porphyrin Cages**

### **Promotes Electrochemical Nitrate Reduction to Ammonia**

You Wu,<sup>a,†</sup> Yangpeng Zhang,<sup>a,†</sup> Hao Zhao,<sup>a,†</sup> Yang Peng,<sup>a</sup> Hailing Ma,<sup>a</sup> Fangyuan Kang,<sup>b</sup> Zhonghua Li,<sup>a,\*</sup> Yang Liu,<sup>c,\*</sup> and Qichun Zhang<sup>b,d,\*</sup>

<sup>a</sup> School of Chemistry and Chemical Engineering, Harbin Institute of Technology, Harbin 150001, P. R. China

<sup>b</sup> Department of Materials Science and Engineering, City University of Hong Kong, Hong Kong SAR 999077, P. R. China

<sup>c</sup> School of Computer Science and Technology, Harbin Institute of Technology, Harbin 150001, P. R. China

<sup>d</sup> Department of Chemistry, Center of Super-Diamond and Advanced Films (COSDAF) & Hong Kong Institute of Clean Energy (HKICE), City University of Hong Kong, Hong Kong SAR 999077, P. R. China

*\*Corresponding author:* lizh@hit.edu.cn (Zhonghua Li); liuyang@hit.edu.cn (Yang Liu); qiczhang@cityu.edu.hk (Qichun Zhang)

## Materials and Characterization

All the chemicals were commercially available and used without further purification.

p-Por-CHO was synthesized based on previous literature.<sup>1</sup>

### Synthesis of PB-2.

PB-2 was synthesized according to a literature method with slight modification.<sup>2</sup> p-Por-CHO (200 mg, 274  $\mu$ mol) and TREN (120.2mg, 822  $\mu$ mol) were dissolved in dry 1,2-dichlorobenzene (150 mL). Trifluoroacetic acid (30  $\mu$ L) was added to this solution, the reaction was stirred at 80 °C for 5 days under an argon atmosphere. After cooling to room temperature, the reaction mixture was filtered to give dark purple solid which was washed with cold 1,2-dichlorobenzene and methanol. <sup>1</sup>H NMR (300 MHz, C<sub>2</sub>D<sub>2</sub>Cl<sub>4</sub>)  $\delta$  (ppm) 9.24 (s, 24H), 8.76-8.65 (m, 48H), 8.44 (s, 24H), 8.04 (brs, 48H), 6.77 (brs, 24H), 4.12 (brs, 24H), 3.65 (brs, 24H), 3.23 (brs, 24H) 2.92 (brs, 24H), -3.60(s, 12H). MALDI-TOF (m/z): [M]<sup>+</sup> 5097.3, found: 5097.3.

### Synthesis of PB-Co.

PB-2 (102 mg, 20.0  $\mu$ mol, 1.0 eq.) and CoCl<sub>2</sub> (260 mg, 2.0 mmol, 100 eq.) were dissolved in anhydrous THF (100 mL), the reaction mixture was heated at 70 °C for 24 h under N<sub>2</sub>. After cooling to room temperature, the solvent was removed under reduced pressure. Then, CH<sub>3</sub>CN (25 mL) was added, and after sonication for 1 min to suspend the product, the mixture was transferred to a conical tube and centrifuged. The supernatant was then decanted. This washing cycle with CH<sub>3</sub>CN was repeated eight times. Next, the product was suspended again in CH<sub>3</sub>CN (20 mL) and allowed to soak overnight at room temperature. After vacuum filtration and further washing with

MeOH. MALDI-TOF (m/z):  $[M]^+$  5439.3, found:5439.4

### **Synthesis of PB-Ni**

PB-2 (102 mg, 20.0  $\mu$ mol, 1.0 eq.) and  $\text{Ni}(\text{NO}_3)_2 \cdot 6\text{H}_2\text{O}$  (581.6 mg, 2.0 mmol, 100 eq.) were dissolved in anhydrous THF (100 mL), the reaction mixture was heated at 70 °C for 24 h under  $\text{N}_2$ . After cooling to room temperature, the solvent was removed under reduced pressure. Then,  $\text{CH}_3\text{CN}$  (25 mL) was added, and after sonication for 1 min to suspend the product, the mixture was transferred to a conical tube and centrifuged. The supernatant was then decanted. This washing cycle with  $\text{CH}_3\text{CN}$  was repeated eight times. Next, the product was suspended again in  $\text{CH}_3\text{CN}$  (20 mL) and allowed to soak overnight at room temperature. After vacuum filtration and further washing with MeOH. MALDI-TOF (m/z):  $[M]^+$  5433.3, found:5433.6

### **Synthesis of PB-Cu**

PB-2 (102 mg, 20.0  $\mu$ mol, 1.0 eq.) and  $\text{CuCl}_2$  (268.9 mg, 0.6 mmol, 100 eq.) were dissolved in anhydrous THF (100 mL). Subsequently, 2,6-lutidine (74  $\mu$ L, 0.6 mmol, 30 eq.) was injected, and the reaction mixture was heated at 70 °C for 24 h under  $\text{N}_2$ . After cooling to room temperature, the solvent was removed under reduced pressure. Then,  $\text{CH}_3\text{CN}$  (25 mL) was added, and after sonication for 1 min to suspend the product, the mixture was transferred to a conical tube and centrifuged. The supernatant was then decanted. This washing cycle with  $\text{CH}_3\text{CN}$  was repeated eight times. Next, the product was suspended again in  $\text{CH}_3\text{CN}$  (20 mL) and allowed to soak overnight at room temperature. After vacuum filtration and further washing with MeOH. MALDI-TOF (m/z):  $[M]^+$  5469.3, found:5469.5

**Electrochemical measurements.**

To prepare the working electrode, 5 mg of catalyst power, 1.5 mg of Ketjenblack carbon, and 60  $\mu\text{L}$  of Nafion solution (5 wt%) were dispersed in 940  $\mu\text{L}$  of ethanol and sonicated for 30 min to form a uniform catalyst ink. Then 100  $\mu\text{L}$  catalyst ink was dropcasted on a  $1 \times 1.5 \text{ cm}^2$  carbon paper and dried at room temperature to achieve an area loading of  $0.5 \text{ mg cm}^{-2}$ . Electrochemical  $\text{NO}_3\text{RR}$  measurements were performed in a H-type cell with a three-electrode system. Its two compartments were separated by a Nafion 117 membrane. The H-type cell was controlled by a CHI 660E electrochemical workstation, and equipped with an Ag/AgCl electrode and graphite electrode. The electrolyte was Ar-saturated 0.5 M  $\text{K}_2\text{SO}_4$  containing 0.1 M  $\text{KNO}_3$ . Linear sweep voltammetry (LSV) was collected at a scan rate of  $10 \text{ mV s}^{-1}$ . The chronoamperometry tests were conducted at a series of applied potentials in a typical H-type cell that contains 70 mL electrolyte. The catholyte was then collected and analyzed for dissolved  $\text{NH}_3$  using UV-Vis.

**Determination of the  $\text{NH}_3$  concentration.**

2 mL of diluted product electrolyte (the product from both two chambers and the outlet gas) was first mixed with 2 mL of 1 M NaOH solution containing 5 wt% salicylic acid and 5wt% sodium citrate. Then 1 mL of 0.05 M NaClO solution and 0.2 mL of 1 wt% sodium nitroferricyanide solution were added subsequently. Then the system was shaken to obtain a uniformly mixed solution. After aging the solution for 2 h, the absorption spectra of the obtained green solution were taken by a UV-Vis spectrophotometer, where the absorbance peak at 655 nm was taken for calculation.

The absorbance was substituted by the standard curve to calculate the ammonia concentration. The standard curve was obtained by a series of different ammonia concentration-absorbance curves prepared with  $\text{NH}_4\text{Cl}$ .

#### **Detection of nitrite-N concentration.**

4 g of p-aminobenzenesulfonamide and 0.2 g of N-(1-Naphthyl) ethylenediamine dihydrochloride were dissolved in 10 mL of phosphoric acid. After stirring, it was poured into 50 mL of ultrapure water to obtain Griess reagent. 4 mL of diluted product electrolyte was mixed with 0.1 mL Griess reagent, then shake it for 2 minutes and let it stand for 15 minutes, and its absorption value at 540 nm was measured and recorded. The absorbance was substituted by the standard curve to calculate the nitrite-N concentration. The standard curve was obtained by a series of different nitrate-N concentration-absorbance curves prepared with sodium nitrite.

#### **Isotope labeling experiments.**

To identify the nitrogen source for  $\text{NO}_3\text{RR}$ , the reaction was carried out at -0.9 V vs. RHE for 2 h in 0.5 M  $\text{K}_2\text{SO}_4$  + 0.1 M  $\text{K}^{14}\text{NO}_3$  or 0.5 M  $\text{K}_2\text{SO}_4$  + 0.1 M  $\text{K}^{15}\text{NO}_3$ . At the end of the electrolysis, the catholyte pH was adjusted to 2~4 using diluted 0.1 M HCl. 650  $\mu\text{L}$  of the catholyte was added with 150  $\mu\text{L}$  of  $\text{D}_2\text{O}$  solution containing 20 wt % maleic acid as the internal standard, and then analyzed by  $^1\text{H}$ -NMR.

#### **Calculation the Faradaic efficiency of $\text{NH}_3$ and $\text{NO}_2$ yield.**

The following equation was used to calculate the rate of ammonia yield:

$$\text{Rate of } \text{NH}_3 = \frac{C_{\text{NH}_3} \times V}{t \times m}$$

$\text{NH}_3$  Faradaic efficiency ( $\text{FE}_{\text{NH}_3}$ ) was calculated using the following equation:

$$FE_{NH_3} = \frac{8 \times F \times C_{NH_3} \times V}{Q}$$

where  $C_{NH_3}$  ( $\mu\text{mol L}^{-1}$ ) was the ammonia concentration in the catholyte,  $F$  was the Faraday constant ( $96485 \text{ C mol}^{-1}$ ),  $V$  was the volume of electrolyte (70 mL), and  $Q$  was the total charge passing the electrode.

The yield of nitrite was Calculated by the following formula:

$$\text{Rate of } NO_2^- = \frac{C_{NO_2^-} \times V}{t \times m}$$

The Faradaic efficiency of nitrite was calculated using the following equation:

$$FE_{NO_2^-} = \frac{F \times C_{NH_3} \times V}{Q}$$

where  $C$  ( $\mu\text{mol L}^{-1}$ ) was the concentration of nitrite in the catholyte,  $F$  was the Faraday constant ( $96485 \text{ C mol}^{-1}$ ),  $V$  was the volume of electrolyte (70 mL), and  $Q$  was the total charge passing the electrode.

### Computational Details.

All spin polarized DFT calculations were performed by Quantum ESPRESSO code.<sup>3</sup> The Perdew-Burke-Ernzerhof functional within the generalized gradient approximation was used to describe the electron exchange-correlation interactions.<sup>4</sup> The projector-augmented wave (PAW) method was used to describe ion-electron interaction. The Van der Waals interaction is handled by empirical DFT-D3 (BJ) correction.<sup>5,6</sup> A cutoff energy of 60 and 240 Ry was used for the plane-wave basis set. A gamma-centered  $1 \times 1 \times 1$  k-mesh is used for structure optimization. The criteria of energy convergence and force convergence are set to  $10^{-6}$  Ry for the cell and  $1 \times 10^{-3}$  a.u. for each atomic force component. In the DFT calculations, we choose porphyrin ring as the model. The

model was placed in a cubic supercell with lattice parameters of  $20 \text{ \AA} \times 25 \text{ \AA} \times 18 \text{ \AA}$  to minimize the interaction from periodic images. To avoid calculating the energy of charged  $\text{NO}_3^-$  directly, gaseous  $\text{HNO}_3$  is chosen as a reference instead. The adsorption energy of  $\text{NO}_3^-$  ( $\Delta G^*_{\text{NO}_3}$ ) is described as

$$\Delta G^*_{\text{NO}_3} = -G^*_{\text{NO}_3} - G^* - G_{\text{HNO}_3(\text{g})} + \Delta G_{\text{correct}}$$

where  $G^*_{\text{NO}_3}$ ,  $G^*$ ,  $G_{\text{HNO}_3(\text{g})}$ , and  $G_{\text{H}_2(\text{g})}$  are the Gibbs free energy of  $\text{NO}_3^-$  adsorbed on substrates, pure substrates,  $\text{HNO}_3$ , and  $\text{H}_2$  molecules in the gas phase, respectively.

$\Delta G_{\text{correct}}$  denotes the correction of adsorption energy and is set to 0.392 eV.<sup>7</sup>

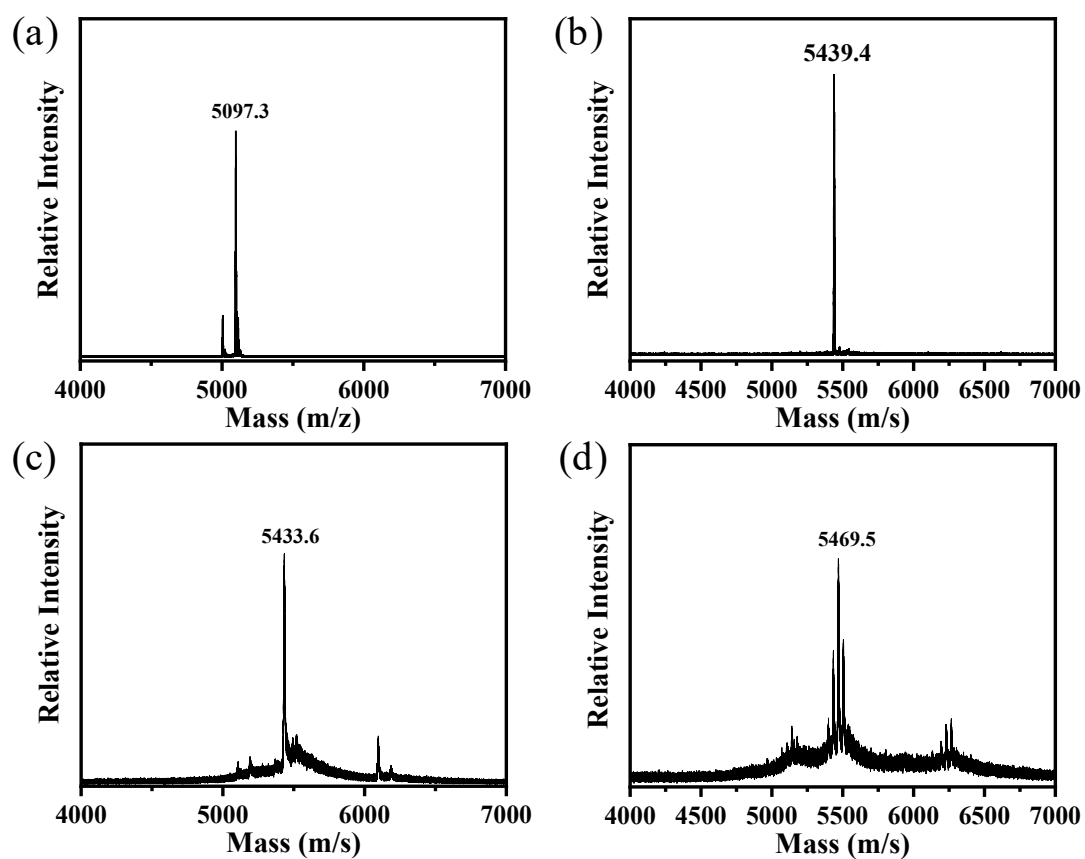

**Figure S1.** MALDI-TOF mass spectrum of the PB-2 and PB-M (M = Co, Ni, Cu) (Matrix: DCTB). (a) PB-2; (b) PB-Co; (c) PB-Ni; (d) PB-Cu.



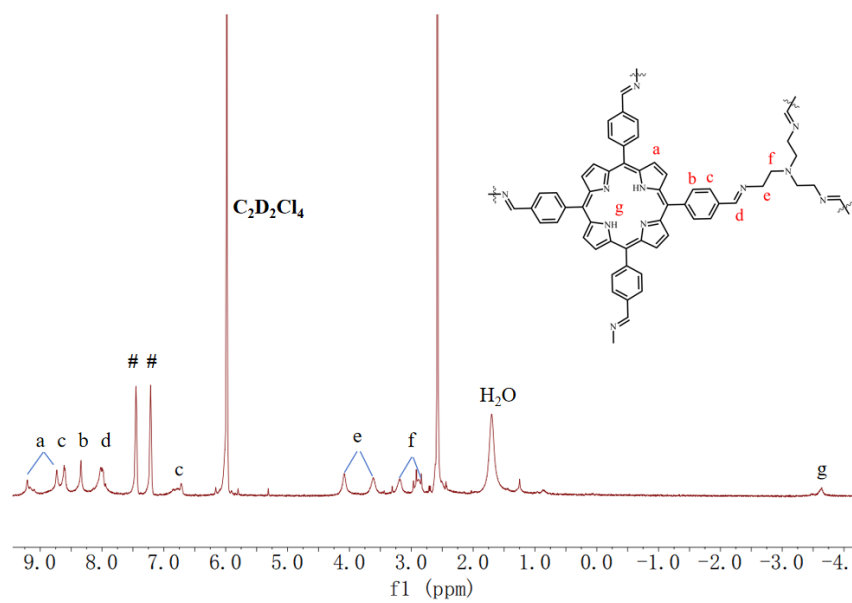

**Figure S2.**  $^1\text{H}$  NMR spectrum of the PB-2 ( $\text{C}_2\text{D}_2\text{Cl}_4$ ).

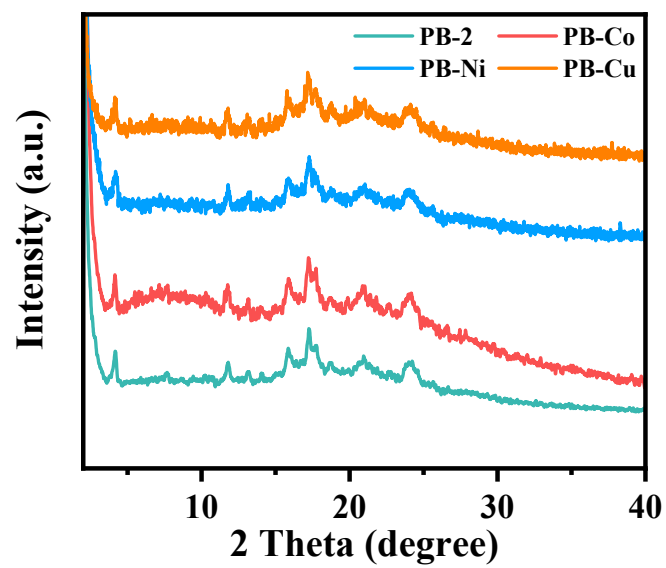

**Figure S3.** Powder X-ray diffraction of simulated PB-2, synthesized PB-2 and PB-M (M = Co, Ni, Cu)

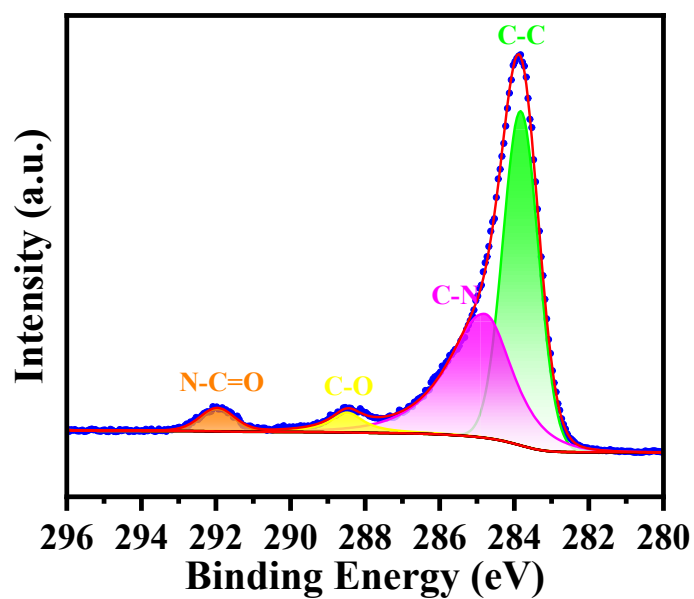

**Figure S4.** C1s XPS spectra of PB-2.

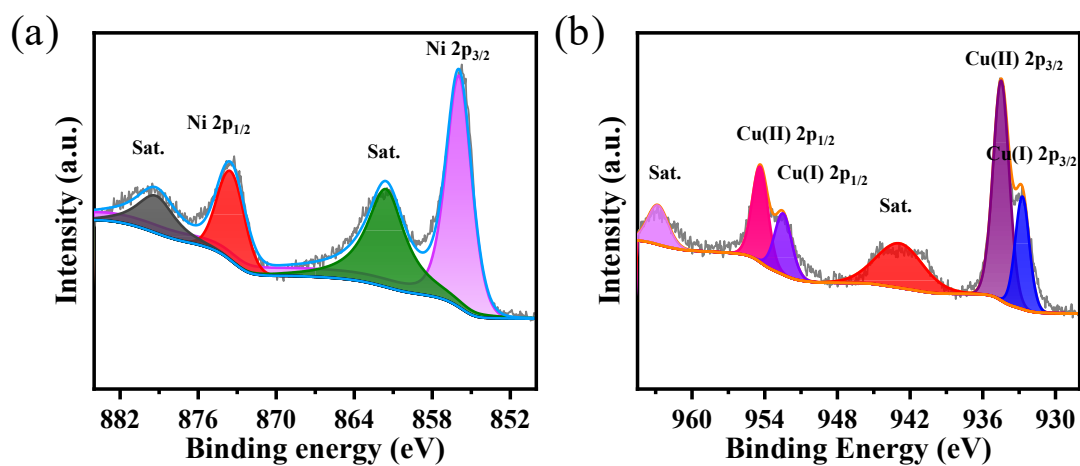

**Figure S5.** (a) High-resolution Ni 2p XPS spectra of PB-Ni. (b) High-resolution Cu 2p XPS spectra of PB-Cu.

**Table S2.** The actual content ratio of metal ions (M = Co, Ni, Cu) compared to the theoretical content.

| Sample | actual content | theoretical content |
|--------|----------------|---------------------|
| PB-Co  | 6.04 %         | 6.5 %               |
| PB-Ni  | 6.27 %         | 6.5%                |
| PB-Cu  | 7.18 %         | 7.0 %               |

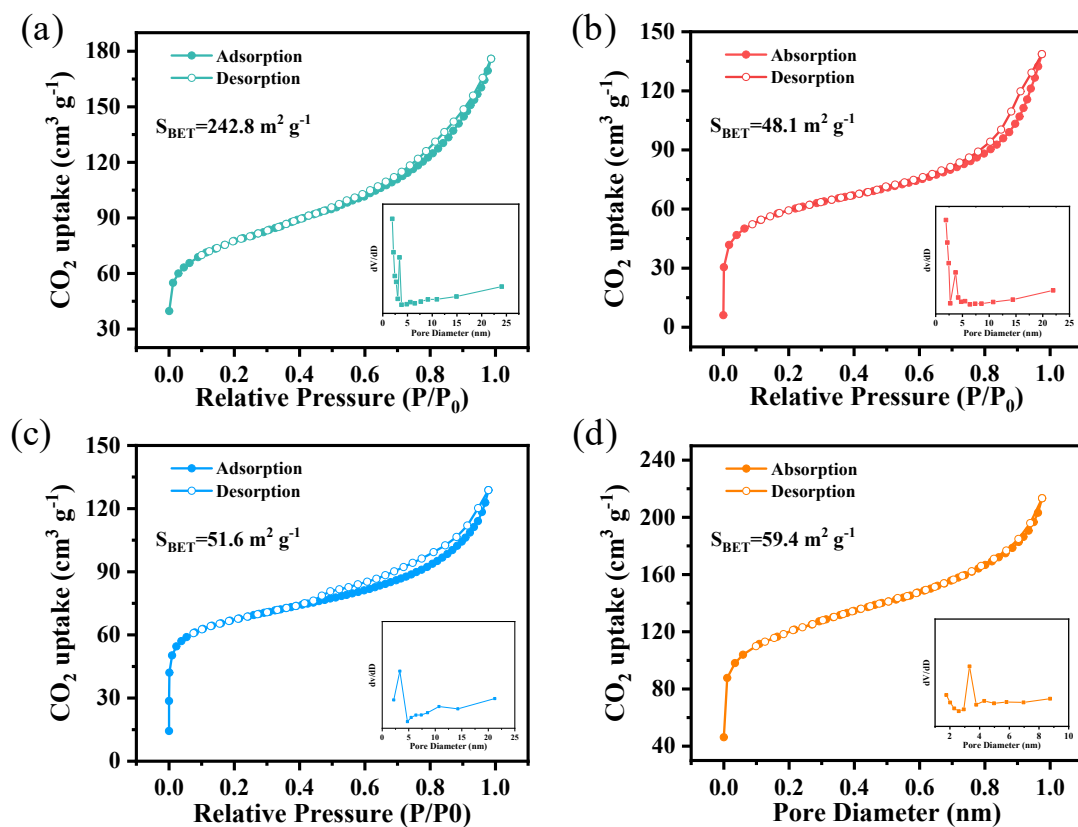

**Figure S6.** CO<sub>2</sub> adsorption-desorption curves (195 K) and pore width distribution. (a) PB-2; (b) PB-Co; (c) PB-Ni; (d) PB-Cu.

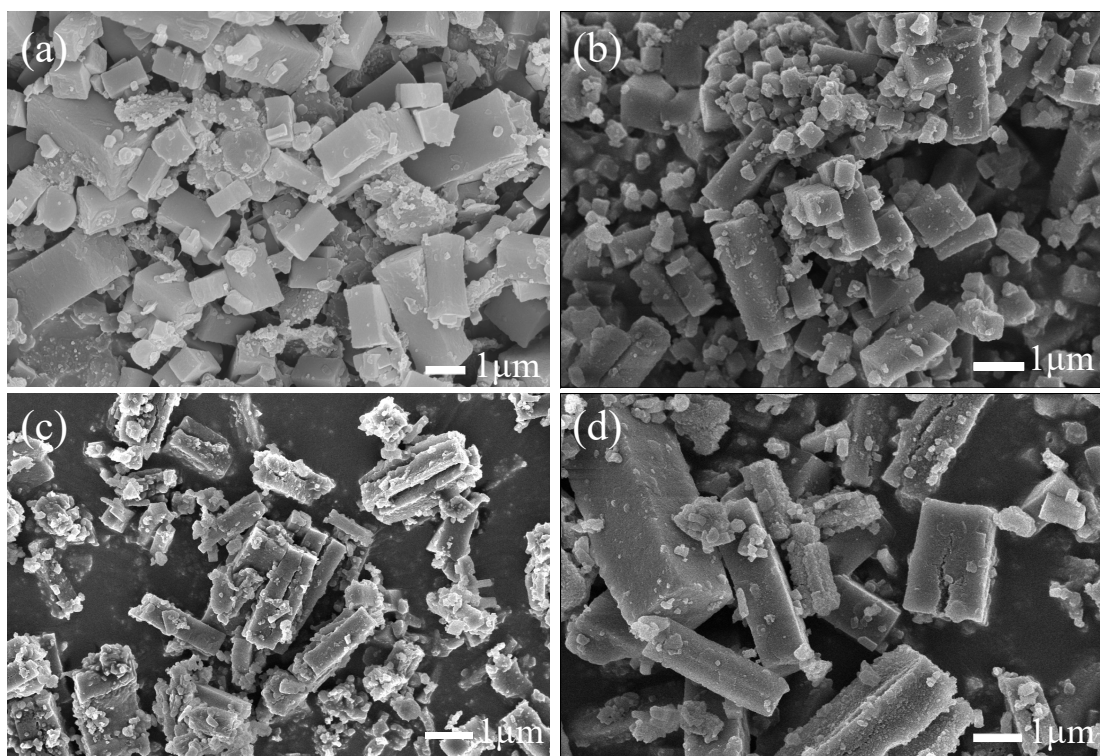

**Figure S7.** SEM images of (a) PB-2; (b) PB-Co.

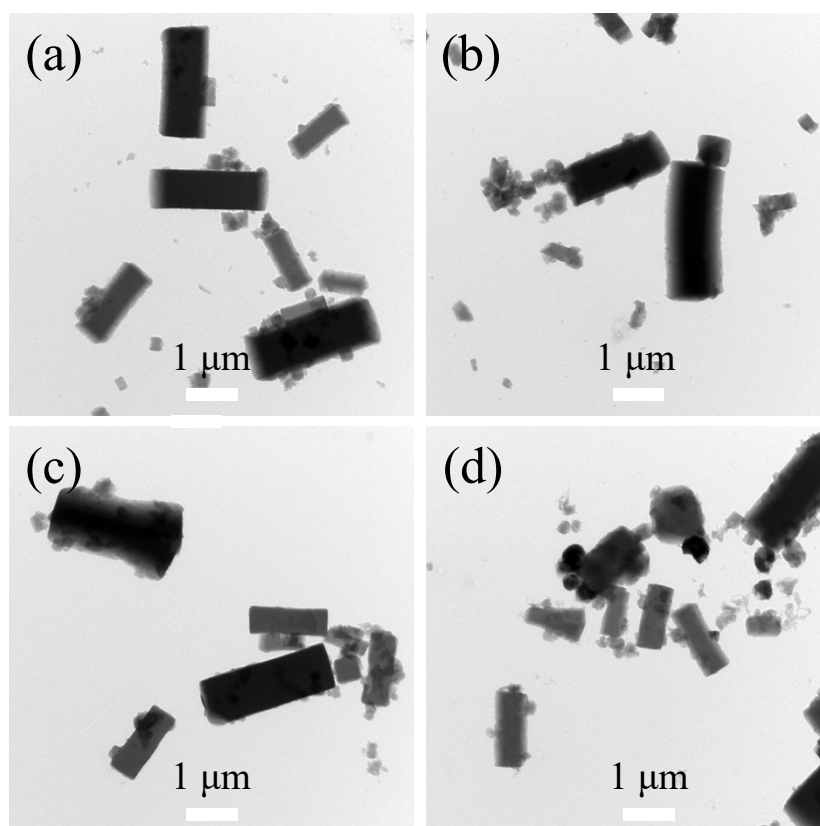

**Figure S8.** TEM images of (a) PB-2; (b) PB-Co; (c) PB-Ni; (d) PB-Cu.

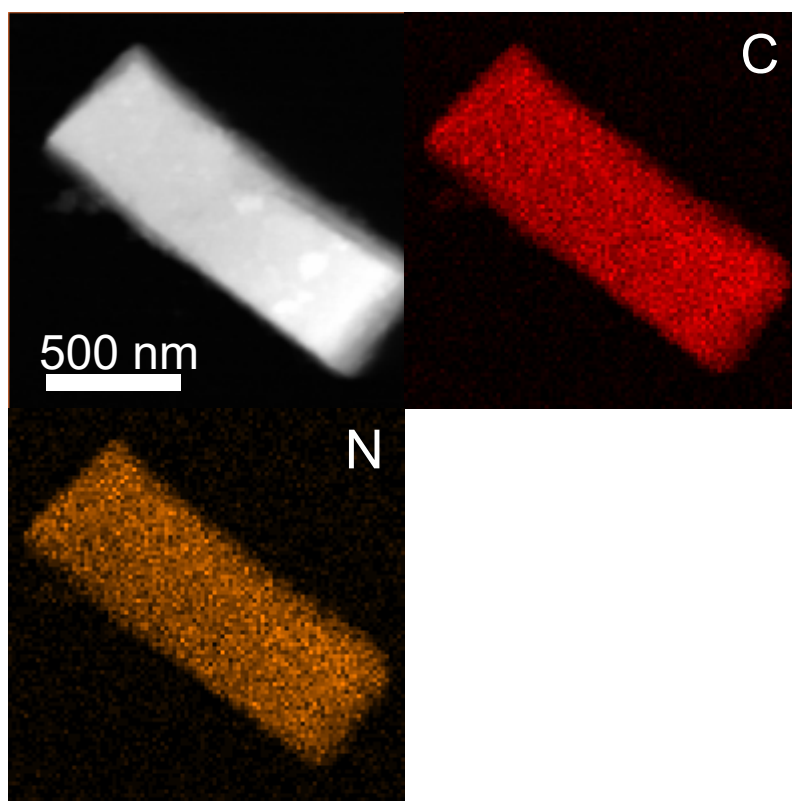

**Figure S9.** TEM mapping image of PB-2.

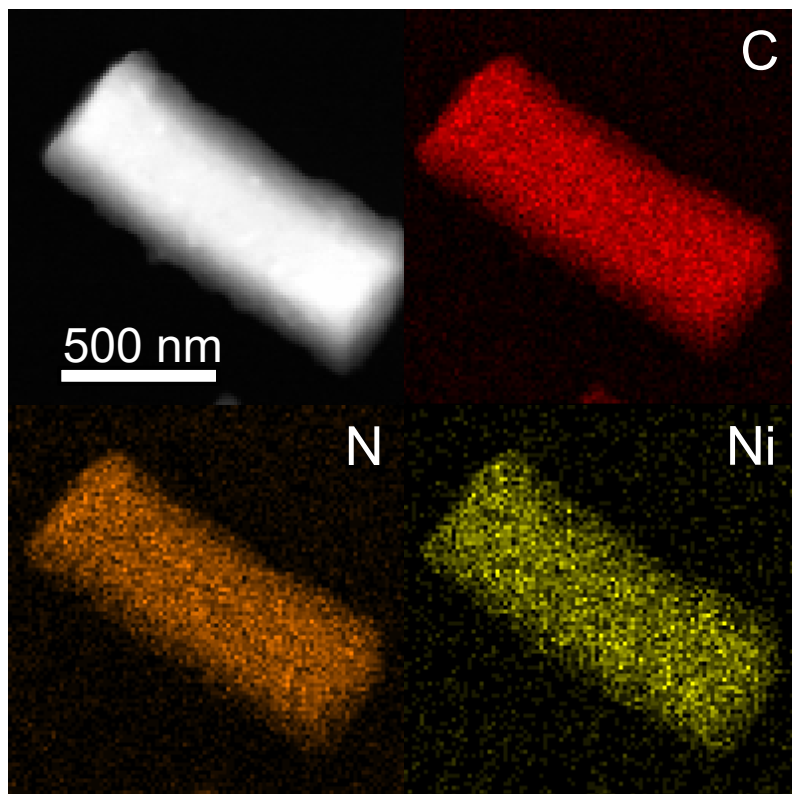

**Figure S10.** TEM mapping image of PB-Ni.

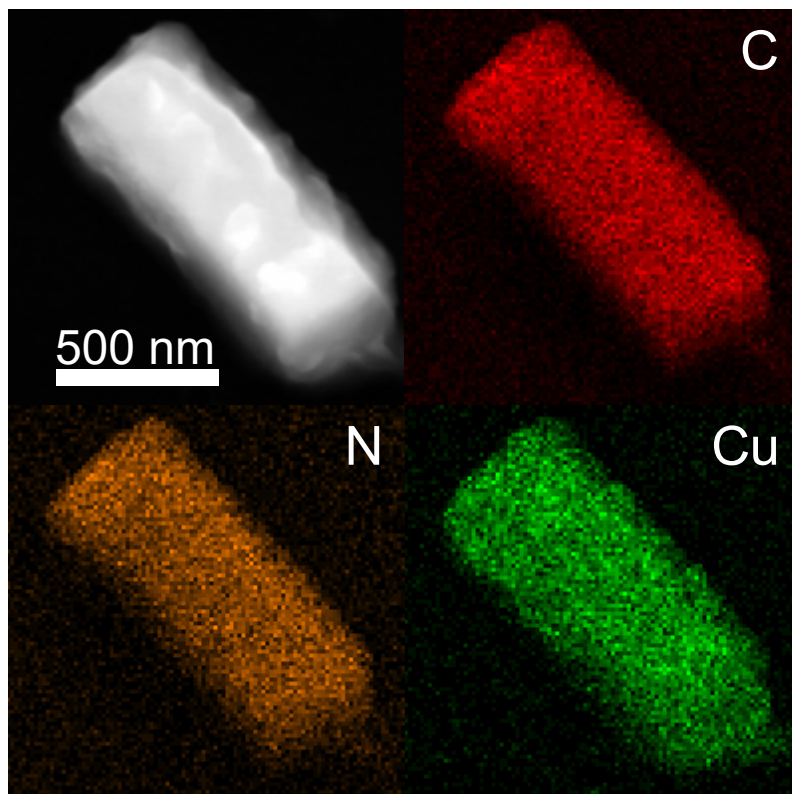

**Figure S11.** TEM mapping image of PB-Cu.



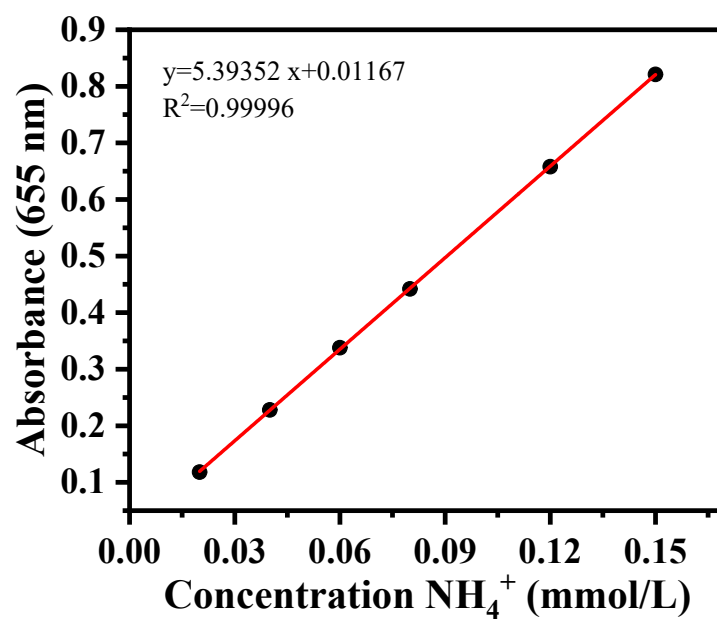

**Figure S12.**  $\text{NH}_4^+$  calibration curve and corresponding best fitting equation.

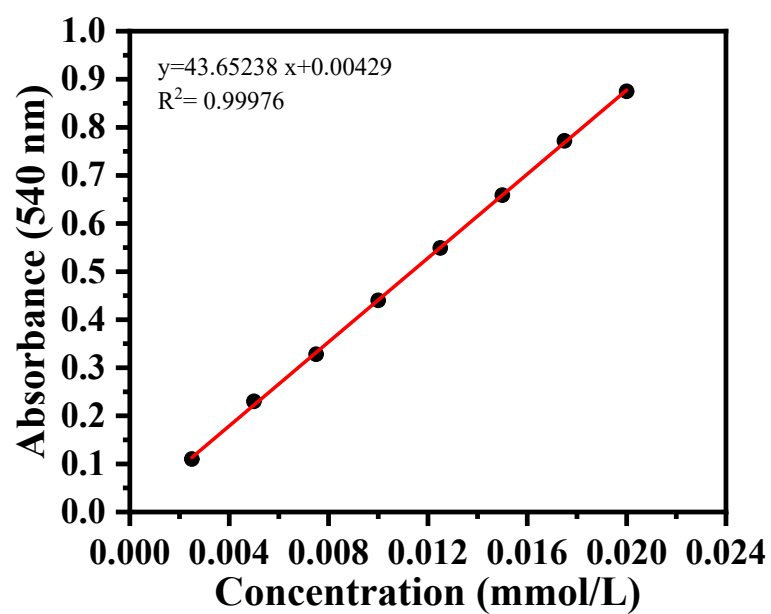

**Figure S13.**  $\text{NO}_2^-$  calibration curve and corresponding best fitting equation.

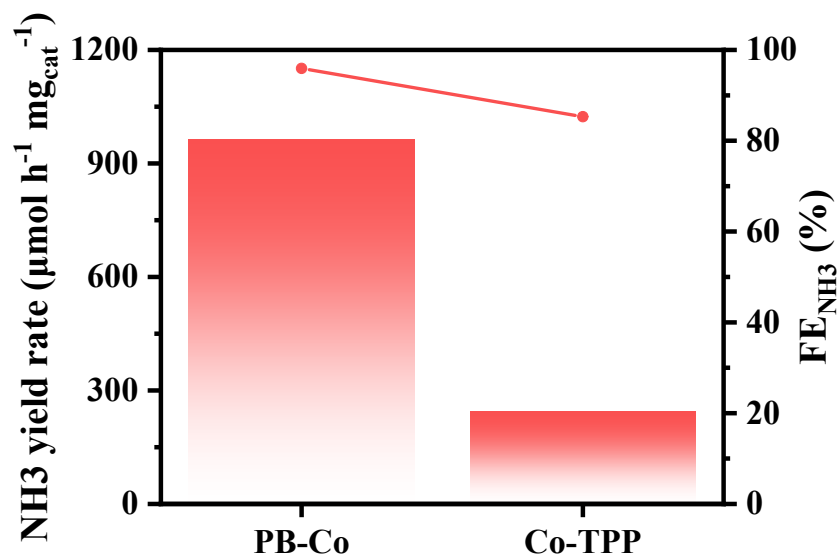

**Figure S14.** The NH<sub>3</sub> yield rate of PB-Co and Co-TPP.

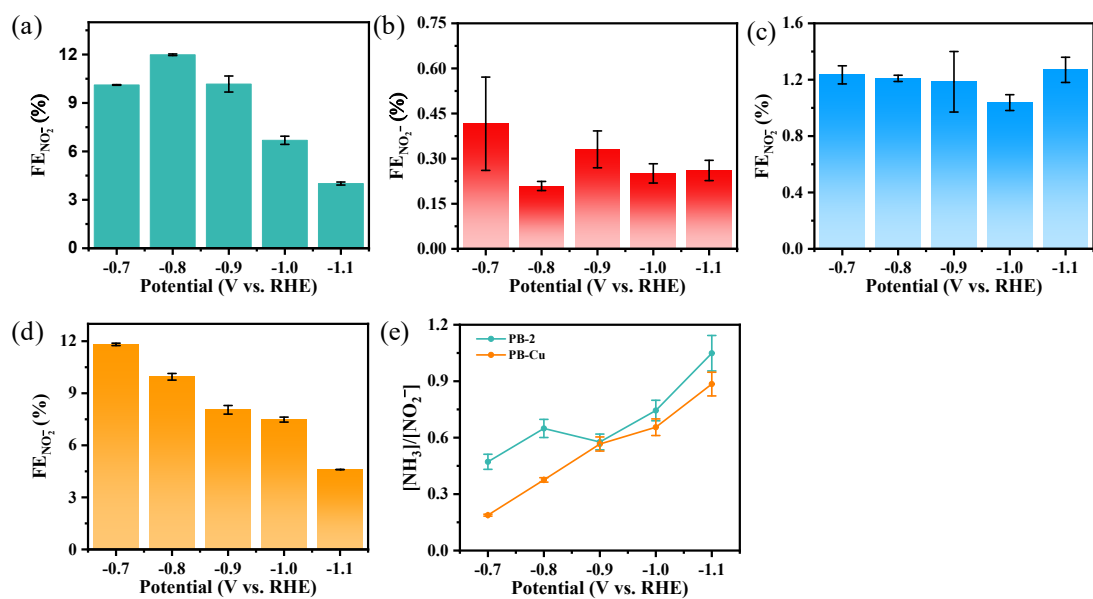

**Figure S15.** FE of Nitrite for (a) PB-2; (b) PB-Co; (c) PB-Ni; (d) PB-Cu. (e) [NH<sub>3</sub>]/[NO<sub>2</sub><sup>-</sup>] for PB-2 and PB-Cu at different potential.

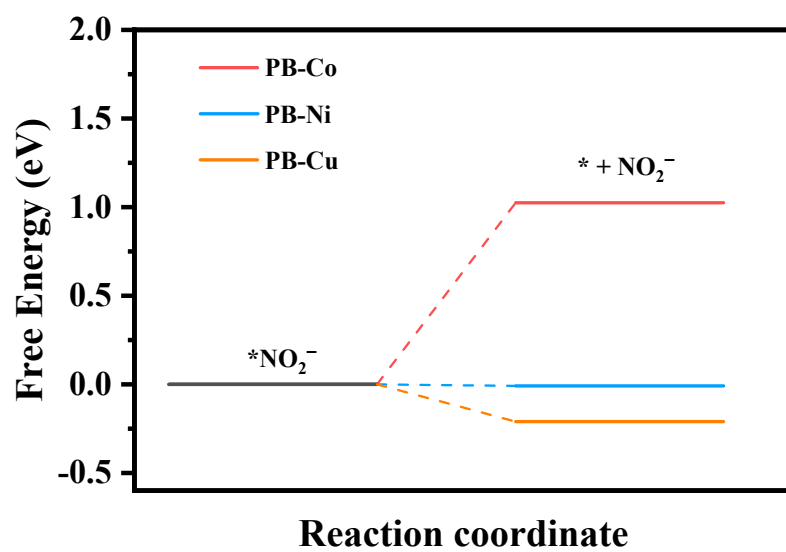

Figure S16. Desorption energy barriers of nitrite on PB-M.

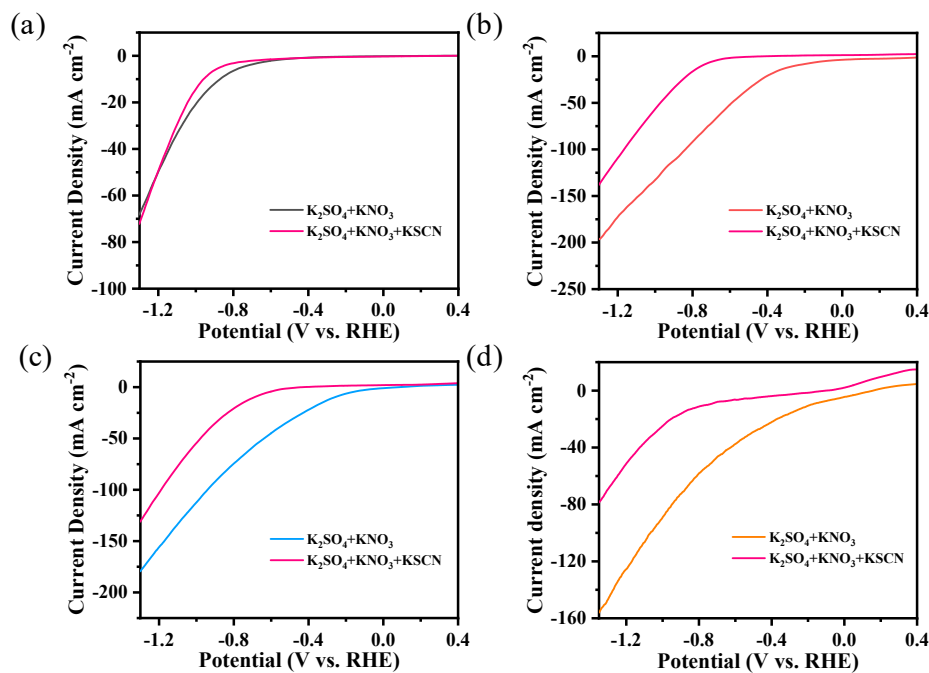

**Figure S17.** LSV curves of CP and PB-M (M=Ni, Cu) in 0.5 M  $\text{K}_2\text{SO}_4$  + 0.1 M  $\text{KNO}_3$ , and 0.5 M  $\text{K}_2\text{SO}_4$  + 0.1 M  $\text{KNO}_3$  + 0.1 M KSCN electrolyte (a) CP; (b) PB-Co; (c) PB-Ni; (d) PB-Cu.

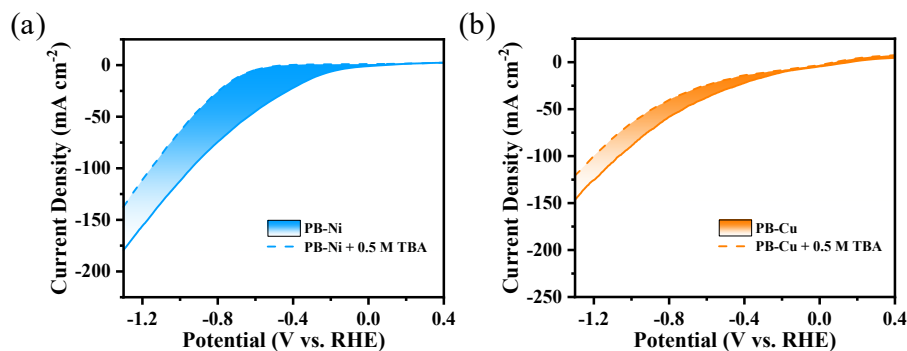

**Figure S18.** Current density change by adding 0.5 M TBA into  $\text{KNO}_3$ -containing electrolyte (a) PB-Ni; (b) PB-Cu.

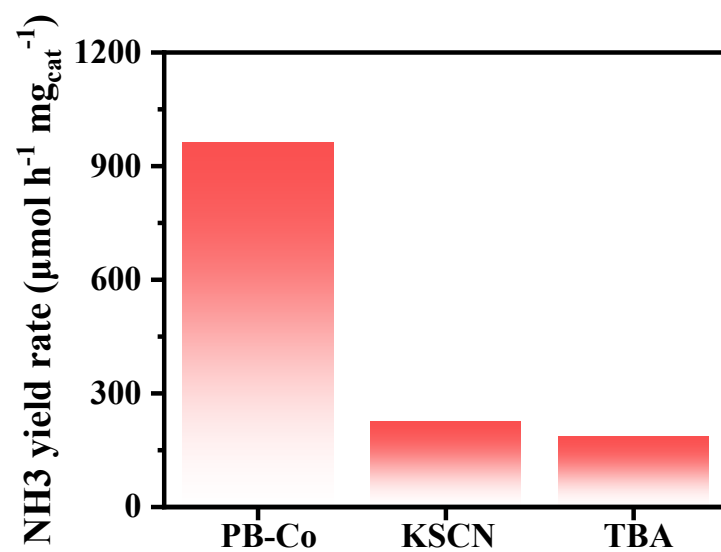

**Figure S19.** The NH<sub>3</sub> yield rate of PB-Co after the addition of KSCN and TBA into the electrolyte, respectively.

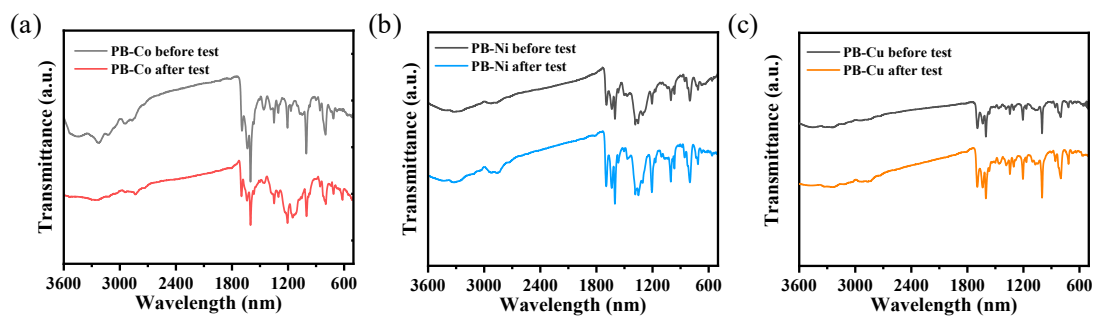

**Figure S20.** FT-IR spectra of samples before and after the long-term electrolysis. (a) PB-Co; (b) PB-Ni; (c) PB-Cu.

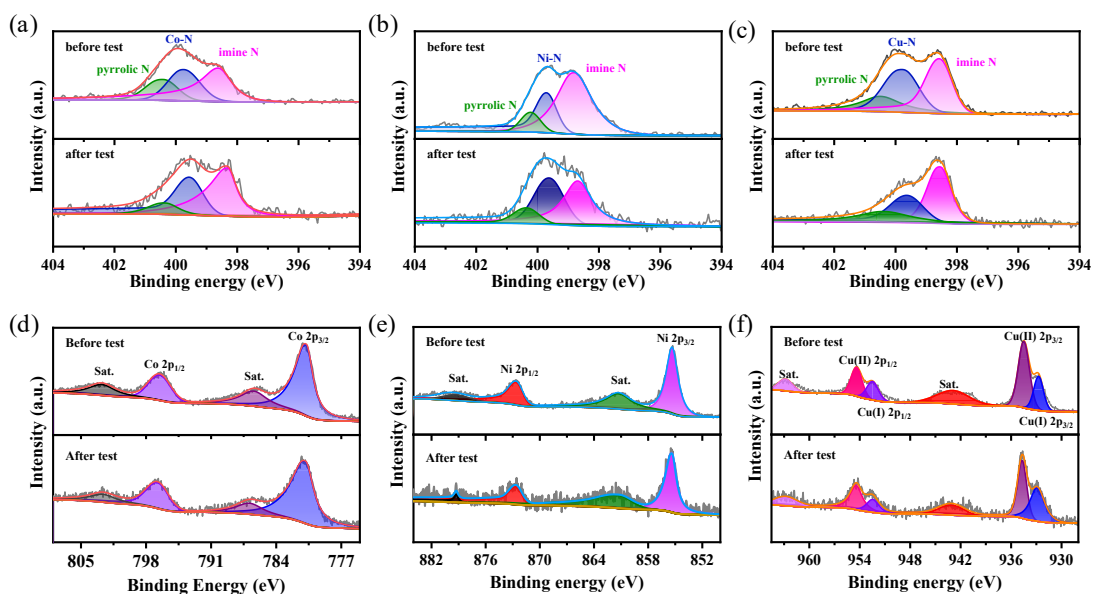

**Figure S21.** High-resolution N 1s XPS spectra of samples before and after the long-term electrolysis. (a) PB-Co; (b) PB-Ni; (c) PB-Cu. High-resolution M (M = Co, Ni, Cu) 2p XPS spectra of samples before and after the long-term electrolysis. (d) PB-Co; (e) PB-Ni; (f) PB-Cu.

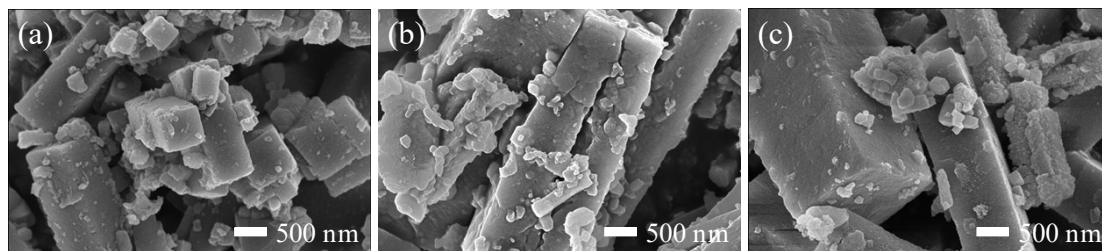

**Figure S22.** SEM images of samples after the long-term electrolysis. (a) PB-Co; (b) PB-Ni; (c) PB-Cu.

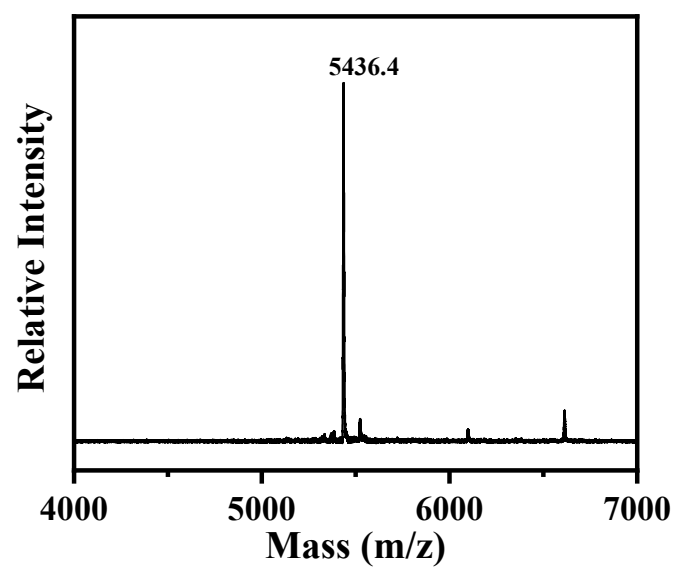

**Figure S23.** MALDI-TOF mass spectrum of PB-Co after the long-term electrolysis.

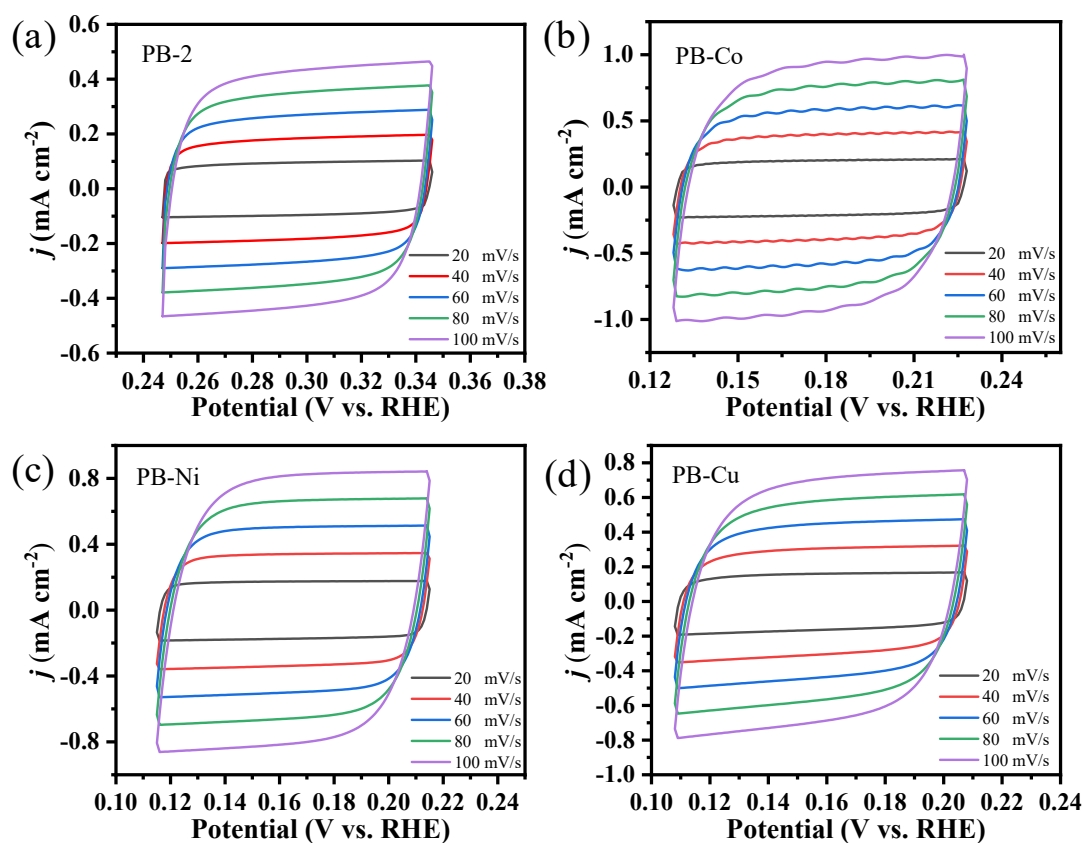

**Figure S24.** The cyclic voltammetry curves for PB-2 and PB-M in non-Faradic area with scan rates of 20, 40, 60, 80 and 100 mV s<sup>-1</sup>. (a) PB-2; (b) PB-Co; (c) PB-Ni; (d) PB-Cu.



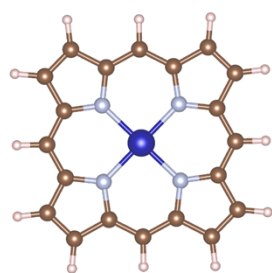

**Co:-1.064**

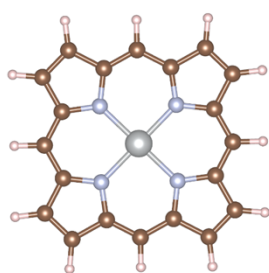

**Ni:-0.8818**

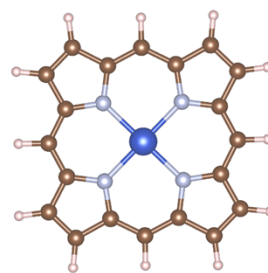

**Cu:-0.9434**

**Figure S25.** Bader charge PB-M (M = Co, Ni, Cu).

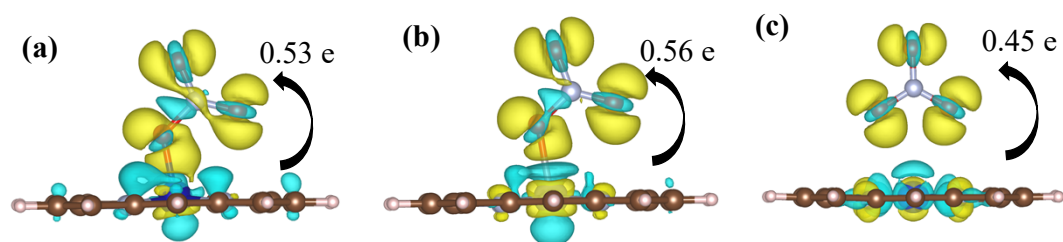

**Figure S26.** Charge density difference and corresponding charge transfer. (a) PB-Co; (b) PB-Ni; (c) PB-Cu.

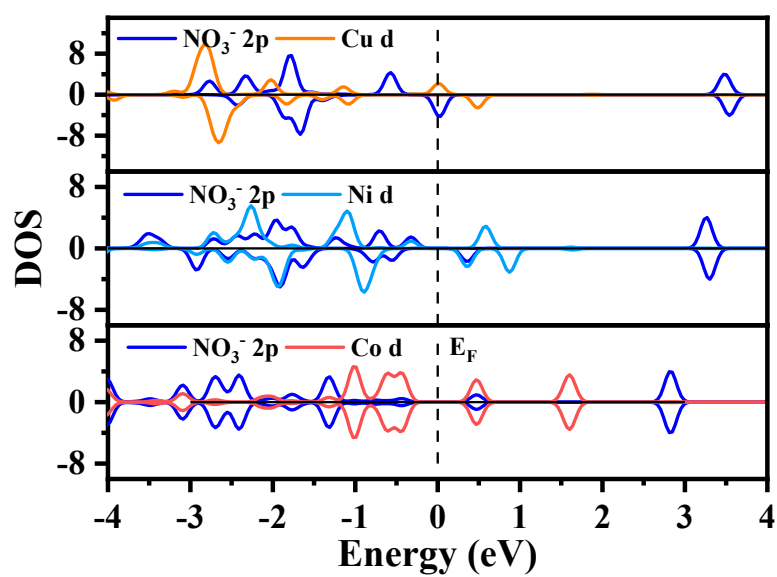

**Figure S27.** PDOS of the M 3d states and  $\text{NO}_3^-$  2p states.

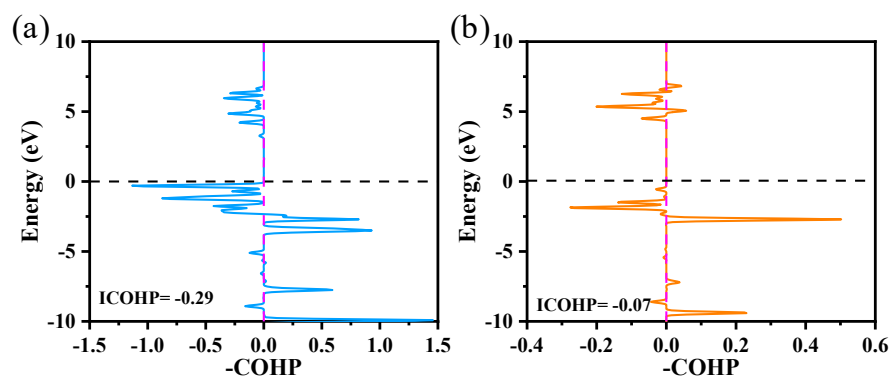

**Figure S28.** (a) COHP between the Ni and  $\text{NO}_3^-$ ; (b) COHP between the Cu and  $\text{NO}_3^-$ .

**Table S2.** Comparison of performance of PB-M with reported catalysts by electrocatalytic nitrate reduction

| Catalysts                                       | Electrolyte                                             | Potential (V vs. RHE) | FE (%) | Yield rate ( $\mu\text{mol h}^{-1} \text{cm}^{-2}$ ) | Ref |
|-------------------------------------------------|---------------------------------------------------------|-----------------------|--------|------------------------------------------------------|-----|
| NiPr-TPA-COF                                    | 0.5 M $\text{K}_2\text{SO}_4$ + 0.1 M $\text{KNO}_3$    | -0.75                 | 90     | 147.1                                                | 8   |
| HOF-Cu                                          | 0.5 M $\text{K}_2\text{SO}_4$ + 0.1 M $\text{KNO}_3$    | -1.0                  | 93.8   | 650                                                  | 9   |
| $\text{Ni}_{1.5}\text{Cu}_{1.5}(\text{HITP})_2$ | 0.1 M $\text{Na}_2\text{SO}_4$ + 50 mM $\text{NaNO}_3$  | -0.9                  | 72.45  | 130.93                                               | 10  |
| $\text{Cu}_1\text{Co}_1\text{HHTP}$             | 0.5 M $\text{Na}_2\text{SO}_4$ + 0.1 M $\text{NaNO}_3$  | -0.6                  | 96.4   | 299.9                                                | 11  |
| $\text{Fe}(\text{TCNQ})_2/\text{CF}$            | 0.2 M $\text{NaNO}_3$ + 0.1 M $\text{Na}_2\text{SO}_4$  | -1.1                  | 85.2   | 667.7                                                | 12  |
| CoQPyPhen I/CNT                                 | 0.1 M $\text{K}_2\text{SO}_4$ + 0.1 M $\text{KNO}_3$    | -0.6                  | 94.29  | 533.8                                                | 13  |
| Cu-Fe-N-C                                       | 1 M KOH + 0.1 M $\text{KNO}_3$                          | -0.8                  | 95.08  | 1220                                                 | 14  |
| Mn-O-C                                          | 0.1 M $\text{K}_2\text{SO}_4$ + 1000 ppm $\text{KNO}_3$ | -0.5                  | 89.0   | 86.8                                                 | 15  |
| COF-366-Fe                                      | 0.5 M $\text{K}_2\text{SO}_4$ + 0.1 M $\text{KNO}_3$    | -1.7 vs. SCE          | 85.4   | 169.52                                               | 16  |
| CuPOR-COF                                       | 1 M KOH + 1 M $\text{KNO}_3$                            | -1.7                  | 86     | 352.9                                                | 17  |
| NiTP-CoTAPP MCOF                                | 0.5 M $\text{KNO}_3$                                    | -0.8                  | 85.6   | 64.08                                                | 18  |

|                             |                                                                                   |             |             |              |                  |
|-----------------------------|-----------------------------------------------------------------------------------|-------------|-------------|--------------|------------------|
| Ni-TAPP-<br>Cu              | 0.05 M K <sub>2</sub> SO <sub>4</sub> + 0.5<br>M KNO <sub>3</sub>                 | -1.3        | 86.13       | 273.7        | 19               |
| CoFe-<br>cMOF               | 1 M Na <sub>2</sub> SO <sub>4</sub> + 0.5<br>M KNO <sub>3</sub>                   | -0.7        | 94.3        | 829.4        | 20               |
| TpBpy-Cu-<br>F              | 0.5 M Na <sub>2</sub> SO <sub>4</sub> + 0.5<br>M NaNO <sub>3</sub>                | -0.746      | 92.7        | 876.5        | 21               |
| BECOF/Pd<br>CuCu            | 0.05 M H <sub>2</sub> SO <sub>4</sub><br>+ 0.1 M KNO <sub>3</sub>                 | -1.3        | 91.0        | 2202         | 22               |
| Ru-Tta-Dfp                  | 1 M KOH + 0.1 M<br>KNO <sub>3</sub>                                               | -0.4        | 93.93       | 68.2         | 23               |
| NiPc-<br>CZDM-<br>COF       | 0.5 M K <sub>2</sub> SO <sub>4</sub> + 0.1<br>M KNO <sub>3</sub>                  | -1.0        | 99.8        | 1147.1       | 24               |
| ImPy-COF-<br>Mn             | NO <sub>3</sub> <sup>-</sup> (2mg mL <sup>-1</sup> ) +<br>1.0 M KOH + 0.5 M<br>KF | -0.7        | 95.64       | 963.5        | 25               |
| Ni-MOF-Ru                   | 1 M KOH + 1 M<br>KNO <sub>3</sub>                                                 | -0.6        | 91.5        | 1310         | 26               |
| Cu <sub>12</sub> -NND-<br>H | 0.1 M KHCO <sub>3</sub> +<br>0.05 M KNO <sub>3</sub>                              | -0.7        | 98.7        | 619.4        | 27               |
| PCN-Cu-<br>DAC              | 1 M KOH + 1 M<br>KNO <sub>3</sub>                                                 | -0.78       | 97.5        | 6000         | 28               |
| Fe <sub>2</sub> Co-MOF      | 0.05 M H <sub>2</sub> SO <sub>4</sub> + 50<br>g L <sup>-1</sup> KNO <sub>3</sub>  | -1.1        | 90.55       | 101.9        | 29               |
| <b>PB-Co</b>                | <b>0.5 M K<sub>2</sub>SO<sub>4</sub> + 0.1<br/>M KNO<sub>3</sub></b>              | <b>-0.9</b> | <b>95.8</b> | <b>497.8</b> | <b>This work</b> |
| <b>PB-Ni</b>                | <b>0.5 M K<sub>2</sub>SO<sub>4</sub> + 0.1<br/>M KNO<sub>3</sub></b>              | <b>-0.7</b> | <b>78.4</b> | <b>251.1</b> | <b>This work</b> |
| <b>PB-Cu</b>                | <b>0.5 M K<sub>2</sub>SO<sub>4</sub> + 0.1</b>                                    | <b>-1.0</b> | <b>78.5</b> | <b>234.3</b> | <b>This work</b> |

**Reference:**

- 1 T. Wang, L. Guo, H. Pei, S. Chen, R. Li, J. Zhang and T. Peng, *Small*, 2021, **17**, 2102957.
- 2 S. Hong, Md. R. Rohman, J. Jia, Y. Kim, D. Moon, Y. Kim, Y. H. Ko, E. Lee and K. Kim, *Angew. Chem. Int. Ed.*, 2015, **54**, 13241–13244.
- 3 P. Giannozzi, S. Baroni, N. Bonini, M. Calandra, R. Car, C. Cavazzoni, D. Ceresoli, G. L. Chiarotti, M. Cococcioni, I. Dabo, A. Dal Corso, S. De Gironcoli, S. Fabris, G. Fratesi, R. Gebauer, U. Gerstmann, C. Gougoussis, A. Kokalj, M. Lazzeri, L. Martin-Samos, N. Marzari, F. Mauri, R. Mazzarello, S. Paolini, A. Pasquarello, L. Paulatto, C. Sbraccia, S. Scandolo, G. Sclauzero, A. P. Seitsonen, A. Smogunov, P. Umari and R. M. Wentzcovitch, *J. Phys.: Condens. Matter*, 2009, **21**, 395502.
- 4 J. P. Perdew, K. Burke and M. Ernzerhof, *Phys. Rev. Lett.*, 1996, **77**, 3865–3868.
- 5 S. Grimme, S. Ehrlich and L. Goerigk, *J. Comput. Chem.*, 2011, **32**, 1456–1465.
- 6 S. Grimme, J. Antony, S. Ehrlich and H. Krieg, *J. Chem. Phys.*, 2010, **132**, 154104.
- 7 H. Niu, Z. Zhang, X. Wang, X. Wan, C. Shao and Y. Guo, *Adv. Funct. Mater.*, 2021, **31**, 2008533.
- 8 F. Lv, M. Sun, Y. Hu, J. Xu, W. Huang, N. Han, B. Huang and Y. Li, *Energy Environ. Sci.*, 2023, **16**, 201–209.
- 9 P. Zhai, C. Wang, Y. Li, D. Jin, B. Shang, Y. Chang, W. Liu, J. Gao and J. Hou, *Nano Lett.*, 2024, **24**, 8687–8695.
- 10 J. Yan, J. Li, P. Liu, H. Huang and W. Song, *Green Chem.*, 2023, **25**, 8645–8651.
- 11 P. Liu, J. Yan, H. Huang and W. Song, *Chem. Eng. J.*, 2023, 466, 143134.
- 12 N. Mukherjee, A. Adalder, N. Barman, R. Thapa, R. Urkude, B. Ghosh and U. K. Ghorai, *J. Mater. Chem. A*, 2024, **12**, 3352–3361.
- 13 L. Sun, C. Dai, T. Wang, X. Jin, Z. J. Xu and X. Wang, *Angew. Chem. Int. Ed.*, 2024, **63**, e202320027.
- 14 X. Zhang, X. Liu, Z.-F. Huang, L. Gan, S. Zhang, R. Jia, M. Ajmal, L. Pan, C. Shi, X. Zhang, G. Yang and J.-J. Zou, *Energy Environ. Sci.*, 2024, **17**, 6717–6727.
- 15 S. Zhang, Y. Zha, Y. Ye, K. Li, Y. Lin, L. Zheng, G. Wang, Y. Zhang, H. Yin, T. Shi and H. Zhang, *Nano-Micro Lett.*, 2024, **16**, 9.
- 16 H. Hu, R. Miao, F. Yang, F. Duan, H. Zhu, Y. Hu, M. Du and S. Lu, *Adv. Energy Mater.*, 2024, **14**, 2302608.
- 17 S. I. G. P. Mohamed, S. Namvar, T. Zhang, H. Shahbazi, Z. Jiang, A. M. Rappe, A. Salehi-Khojin and S. Nejati, *Adv. Mater.*, 2024, **36**, 2309302.
- 18 Z. Zhang, M. Wang, H. Xing, X. Zhou, L. Gao, S. Chen, Y. Chen, H. Xu, W. Li, S. Yuan, C. Li, Z. Jin and J. Zuo, *Angew. Chem. Int. Ed.*, 2025, **64**, e202505580.
- 19 S.-W. Ke, Y. Lv, Y. Gu, J. Su, L. Tang, L. Fang, S. Yuan, J. Ma, M. Ding and J.-L. Zuo, *JACS Au*, 2025, **5**, 2523–2532.
- 20 S. Tian, R. Wu, H. Liu, C. Yan, Z. Qi, P. Song, W. Chen, L. Song, Z. Wang and C. Lv, *Angew. Chem. Int. Ed.*, 2025, **64**, e202510665.
- 21 Y. Zhu, H. Duan, C. G. Gruber, W. Qu, H. Zhang, Z. Wang, J. Zhong, X. Zhang, L. Han, D. Cheng, D. D. Medina, E. Cortés and D. Zhang, *Angew. Chem. Int. Ed.*, 2025, **64**, e202421821.
- 22 Q. Cheng, S. Liu, Y. He, M. Wang, H. Ji, Y. Huan, T. Qian, C. Yan and J. Lu, *Nat. Commun.*, 2025, **16**, 3717.
- 23 A. Chaturvedi, S. Gaber, S. Kaur, K. C. Ranjeesh, T. C. Nagaiah and D. Shetty, *ACS Energy Lett.*, 2024, **9**, 2484–2491.
- 24 M. Li, B. Han, L. Gong, Y. Jin, M. Wang, X. Ding, D. Qi and J. Jiang, *Chin. Chem. Lett.*, 2024, 110590.

- 25 X. Li, S. Xia, S. Yang, X. Yang, S. Zheng, X. Xu, Y. Wang, Q. Xu and Z. Jiang, *Angew. Chem. Int. Ed.*, 2025, **64**, e202507479.
- 26 Y. Yao, X. Wei, H. Zhou, K. Wei, B. Kui, F. Wu, L. Chen, W. Wang, F. Dai, P. Gao, N. Wang and W. Ye, *ACS Catal.*, 2024, **14**, 16205–16213.
- 27 Q. Li, L. Luo, X. Guo, R. Wang, J. Liu, W. Fan, Z. Feng and F. Zhang, *J. Am. Chem. Soc.*, 2025, 147, 1884–1892.
- 28 Q. Li, Y. Li, B. Xu, J. Yang and Y. Wang, *Angew. Chem. Int. Ed.*, 2025, **64**, e202510139.
- 29 Y. Lv, S. Ke, Y. Gu, B. Tian, L. Tang, P. Ran, Y. Zhao, J. Ma, J. Zuo and M. Ding, *Angew. Chem. Int. Ed.*, 2023, **135**, e202305246.
